# Supplementary material for: Follistatin-like 1 protects against hypoxia-induced pulmonary hypertension in mice
Source: PubMed Central journal article supplement (PMC5374469; doi:10.1038/srep45820), 2017-03-31

Follistatin-like 1 protects against hypoxia-induced pulmonary hypertension in mice

Wei Zhang, Wang Wang, Jie Liu, Jinna Li, Juan Wang, Yunxia Zhang, Zhifei Zhang,  
Yafei Liu, Yankun Jin, Jifeng Li, Jie Cao, Chen Wang<sup>\*</sup>, Wen Ning<sup>\*</sup> & Jun Wang<sup>\*</sup>

Supplementary Information

|                           | CTL<br>(n = 7) | COPD only<br>(n = 8) | COPD with PH<br>(n = 8) |
|---------------------------|----------------|----------------------|-------------------------|
| Age (year)                | 70 ± 5         | 77 ± 1               | 74 ± 3                  |
| Male/Female (n)           | 3/4            | 5/3                  | 3/5                     |
| BMI (kg/m <sup>2</sup> )  | 24.2 ± 1.2     | 23.4 ± 2.6           | 24.9 ± 1.1              |
| Smoking pack-years        | 23.4 ± 2.4     | 26.8 ± 5.1           | 38.5 ± 7.9              |
| FEV <sub>1</sub> /FVC (%) |                | 53.1 ± 2.7           | 50.4 ± 3.6              |
| PASP (mmHg)               |                | 26.0 ± 1.3           | 46.8 ± 2.4***           |

**Supplementary Table S1. General characteristics of human subjects.** CTL = healthy controls. COPD = chronic obstructive pulmonary diseases. PH = pulmonary hypertension. BMI = body mass index. FEV<sub>1</sub> = forced expiratory volume in one second. FVC = forced vital capacity. PASP = pulmonary arterial systolic pressure. Data are presented as mean ± SEM. \*\*\* P < 0.001 compared to COPD only.

|            | 0 W           |               | 4 W            |                |
|------------|---------------|---------------|----------------|----------------|
|            | +/+           | +/-           | +/+            | +/-            |
| BW (g)     | 25.34 ± 0.72  | 26.87 ± 1.00  | 24.67 ± 0.75   | 24.15 ± 0.68*  |
| HCT (%)    | 41.00 ± 1.40  | 42.50 ± 1.45  | 49.10 ± 1.15** | 50.83 ± 2.06** |
| MAP (mmHg) | 74.83 ± 3.15  | 72.60 ± 4.08  | 69.83 ± 2.61   | 71.17 ± 1.99   |
| HR (BPM)   | 450.8 ± 13.08 | 449.0 ± 13.18 | 468.3 ± 6.33   | 451.7 ± 15.22  |

**Supplementary Table S2. General characteristics of *FstII*<sup>+/-</sup> and WT mice under hypoxia.** W = week. BW = body weight. HCT = hematocrit. MAP = mean arterial pressure. HR = heart rate. BPM = beats per minute. Data are presented as mean ± SEM, n = 6-10. \* P < 0.05, \*\* P < 0.01 compared to untreated mice.

|            | 0 W           | 4 W + PBS      | 4 W + FSTL1   |
|------------|---------------|----------------|---------------|
| BW (g)     | 22.80 ± 0.67  | 21.91 ± 0.50   | 22.40 ± 0.54  |
| HCT (%)    | 43.25 ± 1.31  | 51.25 ± 1.54** | 48.67 ± 0.33* |
| MAP (mmHg) | 72.86 ± 3.31  | 68.00 ± 2.28   | 72.60 ± 3.12  |
| HR (BPM)   | 442.5 ± 11.61 | 453.9 ± 11.87  | 462.7 ± 9.19  |

**Supplementary Table S3. General characteristics of mice administrated with**

**FSTL1 or PBS under hypoxia.** W = week. BW = body weight. HCT = hematocrit.

MAP = mean arterial pressure. HR = heart rate. BPM = beats per minute. PBS =

phosphate buffer saline. Data are presented as mean ± SEM. n = 6-7. \* P < 0.05, \*\* P

< 0.01 compared to untreated mice.

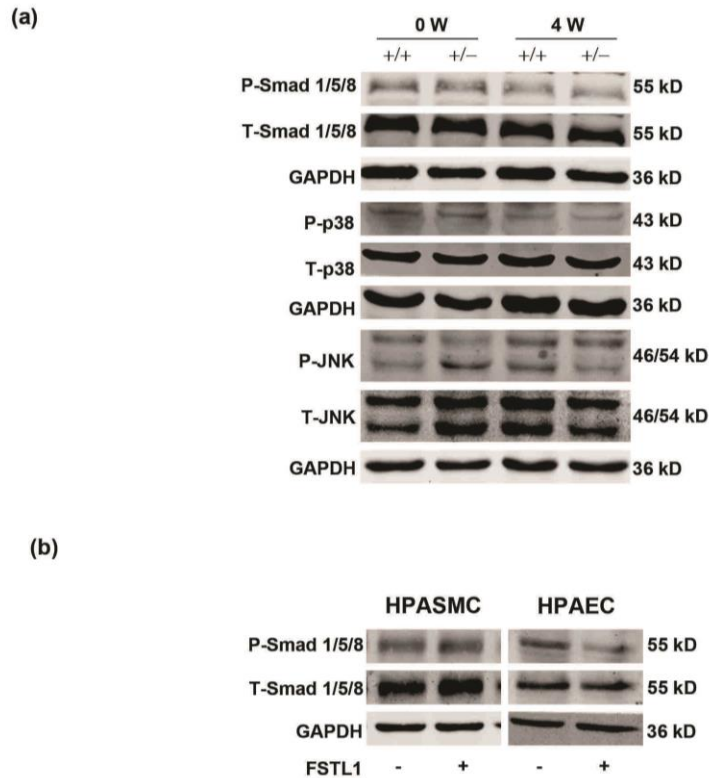

**Supplementary Figure S1. Smad 1/5/8, p38 and JNK activities are not implicated in the modulation FSTL1 on HPH.** (a) Representative western immunoblots for phosphorylations of Smad 1/5/8 (p-Smad 1/5/8), p38 (p-p38) and JNK (p-JNK) in lung tissue of *Fstl1*<sup>+/-</sup> mice and WT controls under hypoxia. n = 6. (b) Representative cropped western immunoblots for phosphorylations of Smad 1/5/8 (p-Smad 1/5/8) in hypoxic HPASMCs and HPAECs. HPH = hypoxia-induced pulmonary hypertension. WT = wide type. HPASMCs = human pulmonary artery smooth muscle cells. HPAECs = human pulmonary artery endothelial cells. JNK = Jun-N-terminal kinase. GAPDH = glyceraldehyde-3-phosphate dehydrogenase. W = week.

(a)

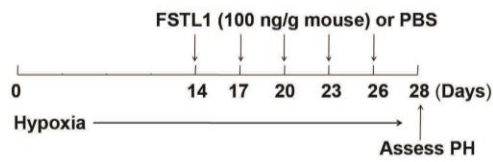

(b)

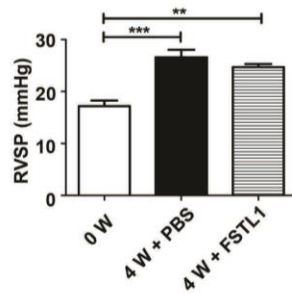

(c)

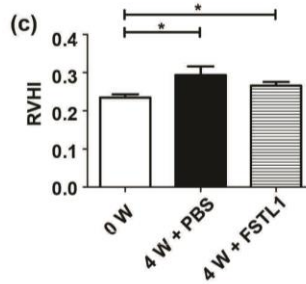

**Supplementary Figure S2. No significantly attenuated HPH is observed by**

**administration of FSTL1 after 2 weeks of hypoxia in mice. (a) Intervention**

**regimen of FSTL1 in HPH model of mice. (b) RVSP and RVHI (c) in mice**

**intravenously administrated with FSTL1 or PBS after 2 weeks of hypoxia. n = 5. Data**

**are presented as mean  $\pm$  SEM. \* P < 0.05, \*\* P < 0.01, \*\*\* P < 0.001. HPH =**

**hypoxia-induced PH. PBS = phosphate buffer saline. RVSP = right ventricular**

**systolic pressure. RVHI = right ventricular hypertrophy index. W = week.**

**Original western blots of figures**

Figure 1e

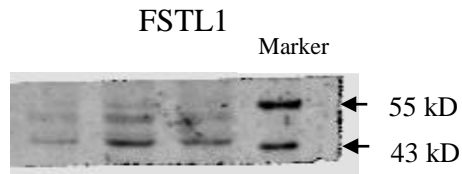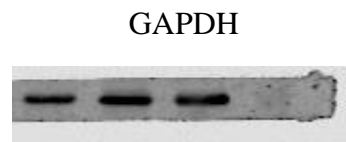

Figure 2a

FSTL1 (serum)

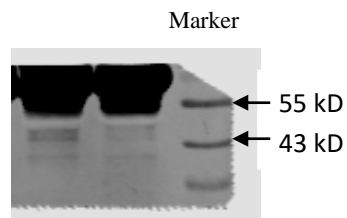

FSTL1

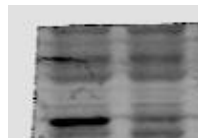

GAPDH

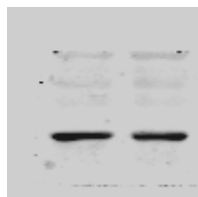

Figure 3b

FSTL1

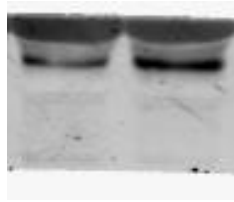

Figure 5b

FSTL1 (media)

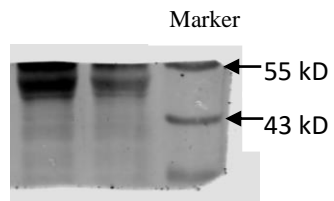

FSTL1

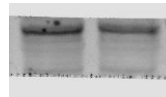

GAPDH

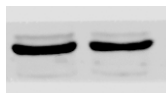

Figure 6a

P-AMPK

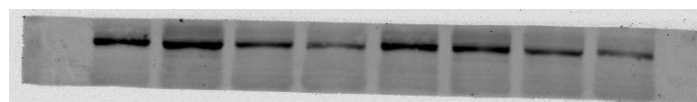

T-AMPK



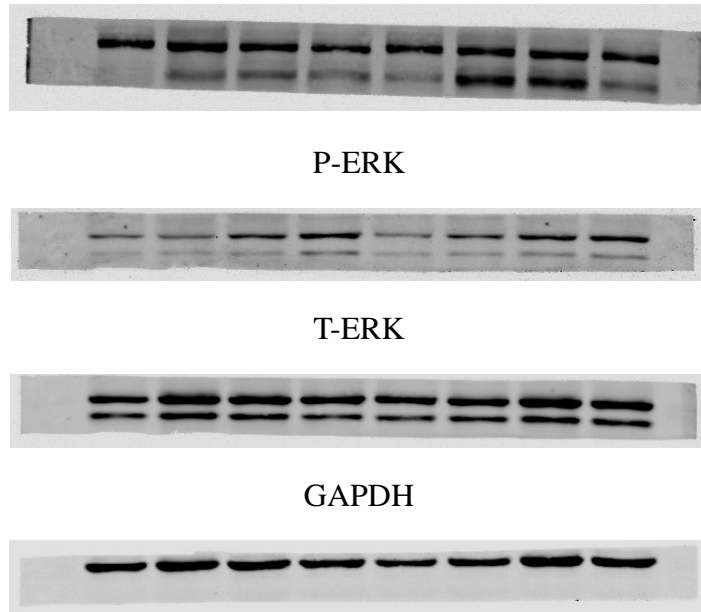

Figure 6b

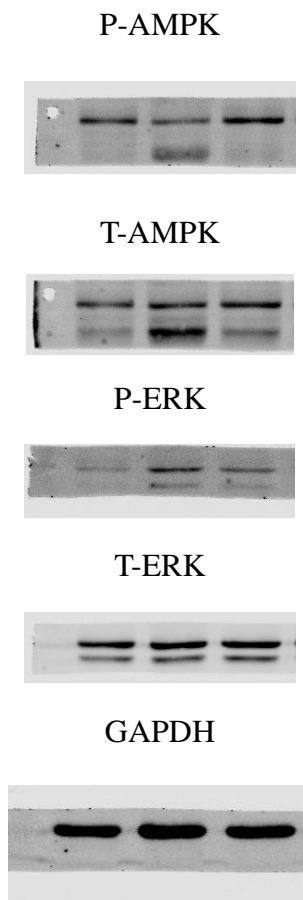

Figure 6c

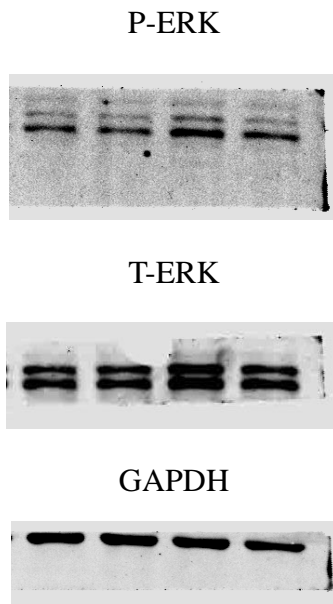

Figure 6d

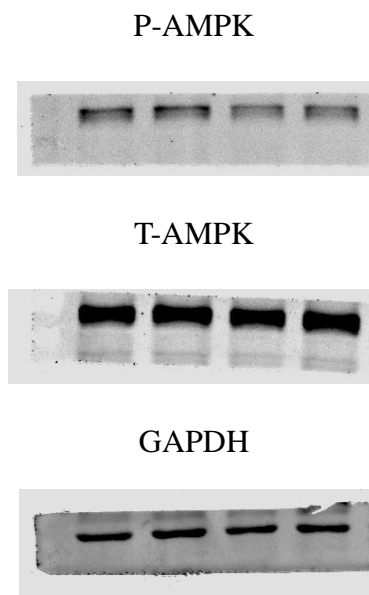

Figure 6e

P-ERK

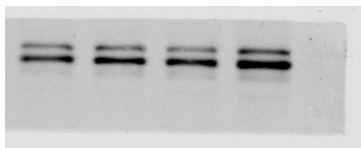

T-ERK

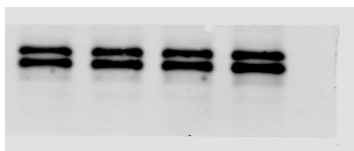

GAPDH

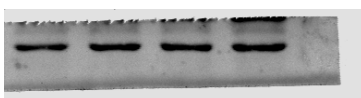

Supplementary Figure S1a

P-Smad 1/5/8

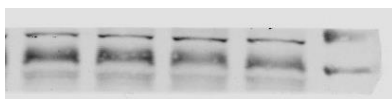

T-Smad 1/5/8

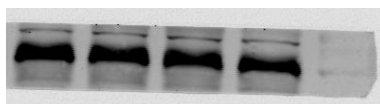

GAPDH

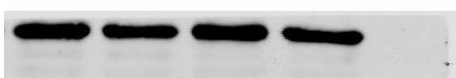

P-p38

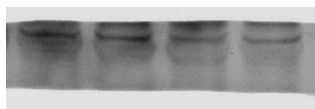

T-p38

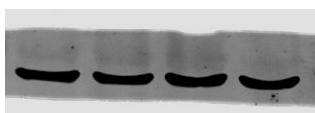

GAPDH

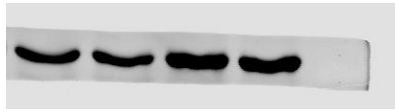

P-JNK

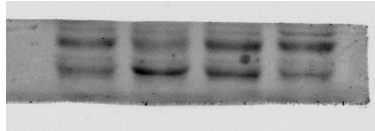

T-JNK

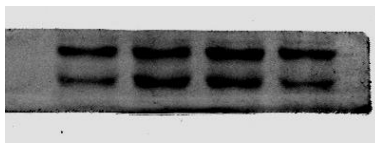

GAPDH

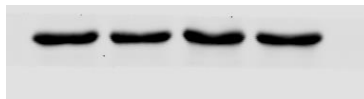

Supplementary Figure S1b

P-Smad 1/5/8

HPASMCs

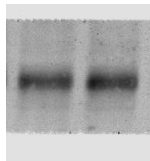

HPAECs

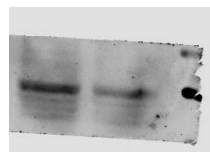

T-Smad 1/5/8

HPASMCs

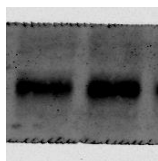

HPAECs

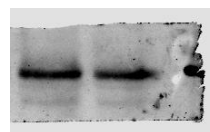

GAPDH

HPASMCs

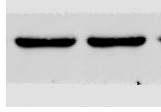

HPAECs

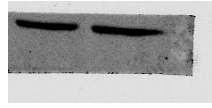

Supplement: srep45820-s1.pdf [file srep45820-s1.pdf]
